# Supplementary material
Source: PubMed Central journal article supplement (PMC6394858)
Supplement: NIHMS1510216-supplement-1.pdf [file NIHMS1510216-supplement-1.pdf]

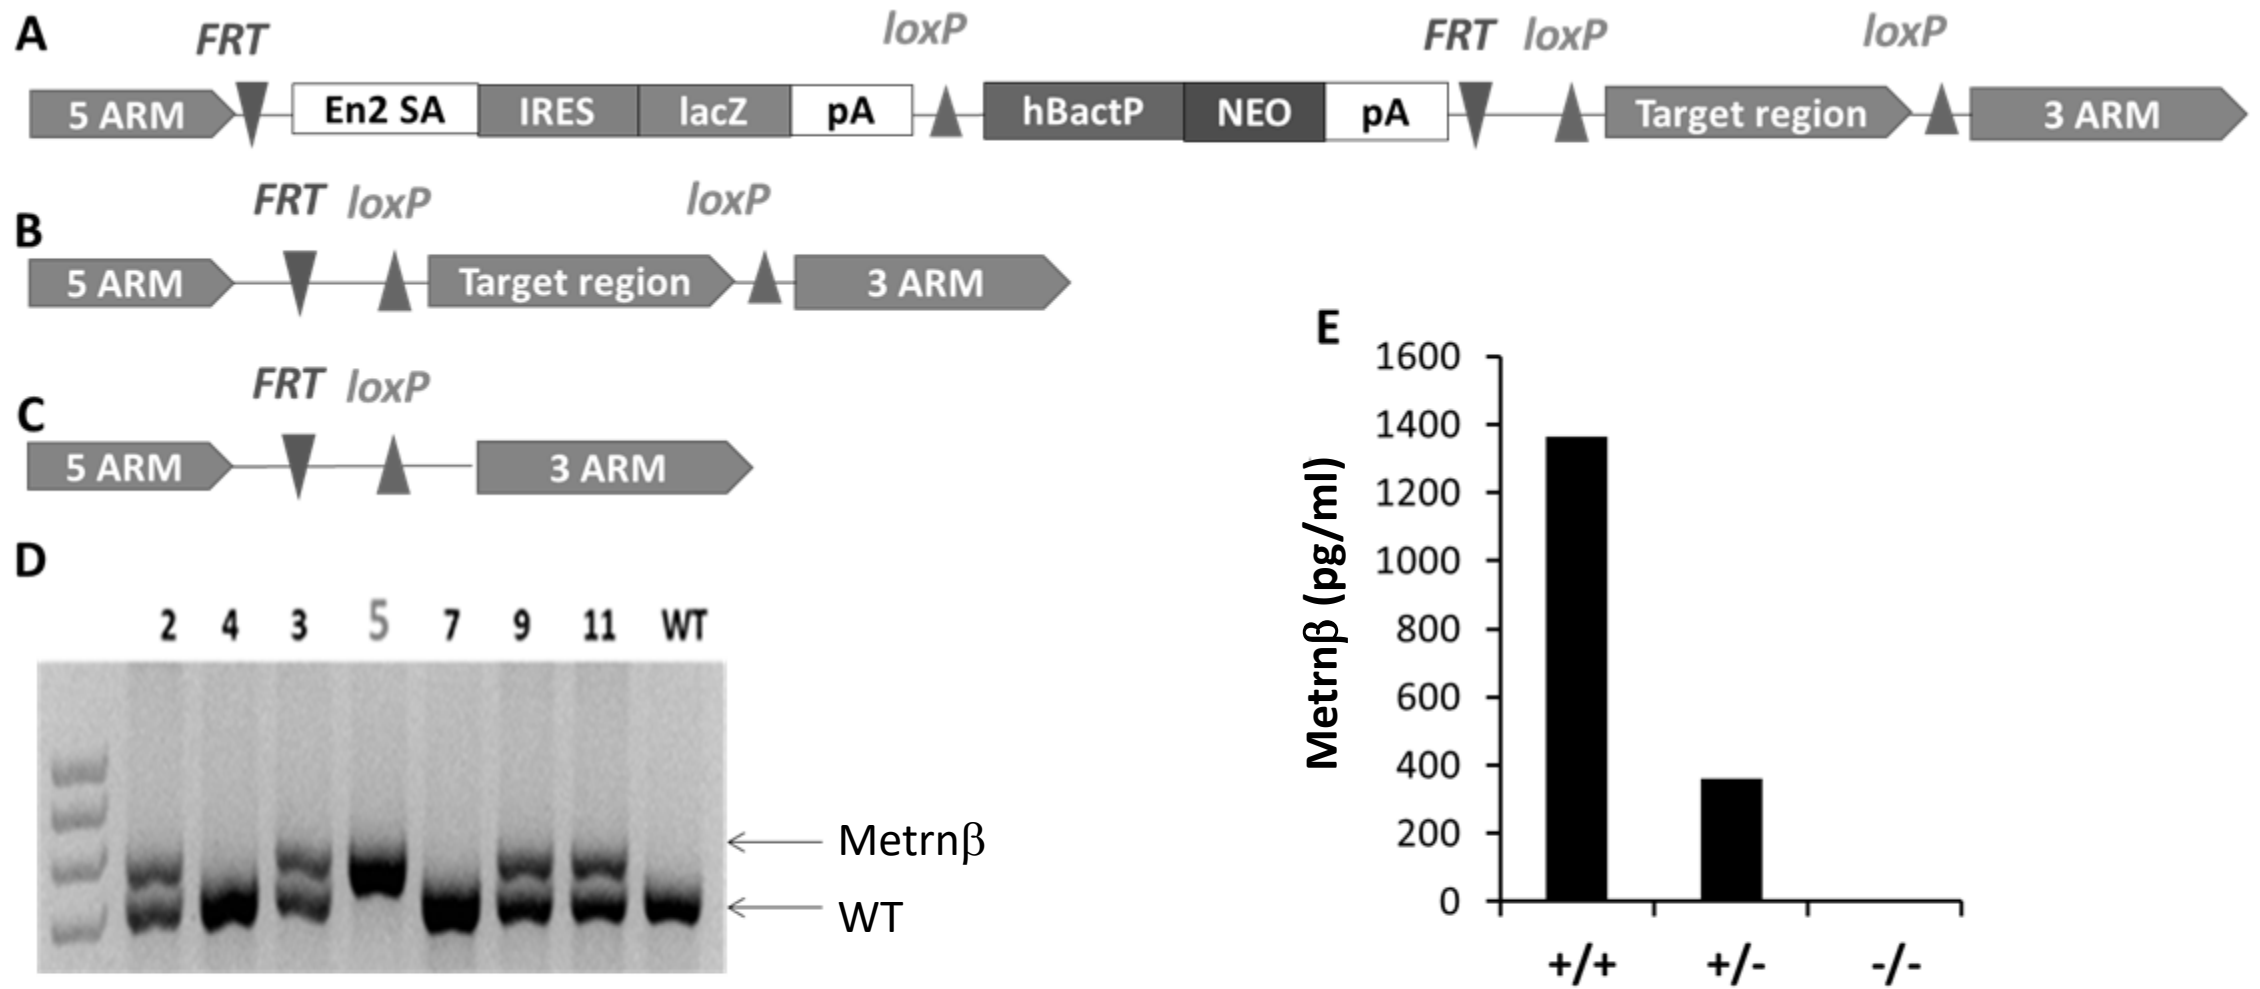

Supplementary Figure 1: Generation of a  $Metrn\beta^{-/-}$  mouse. A. Mouse embryonic stem cells containing a selection cassette that was inserted into the  $Metrn\beta$  locus by homologous recombination. B. ES clones were microinjected into C57Bl/6 blastocysts and the chimeras were bred to FLPeR mice (B). Finally  $Metrn\beta^{Neo=}/loxP+$  mice were bred to CRE mice to delete the  $loxP+$  flanked target region. Heterozygote mice were intercrossed to generate  $Metrn\beta^{-/-}$  mice in the C57Bl/6 background.

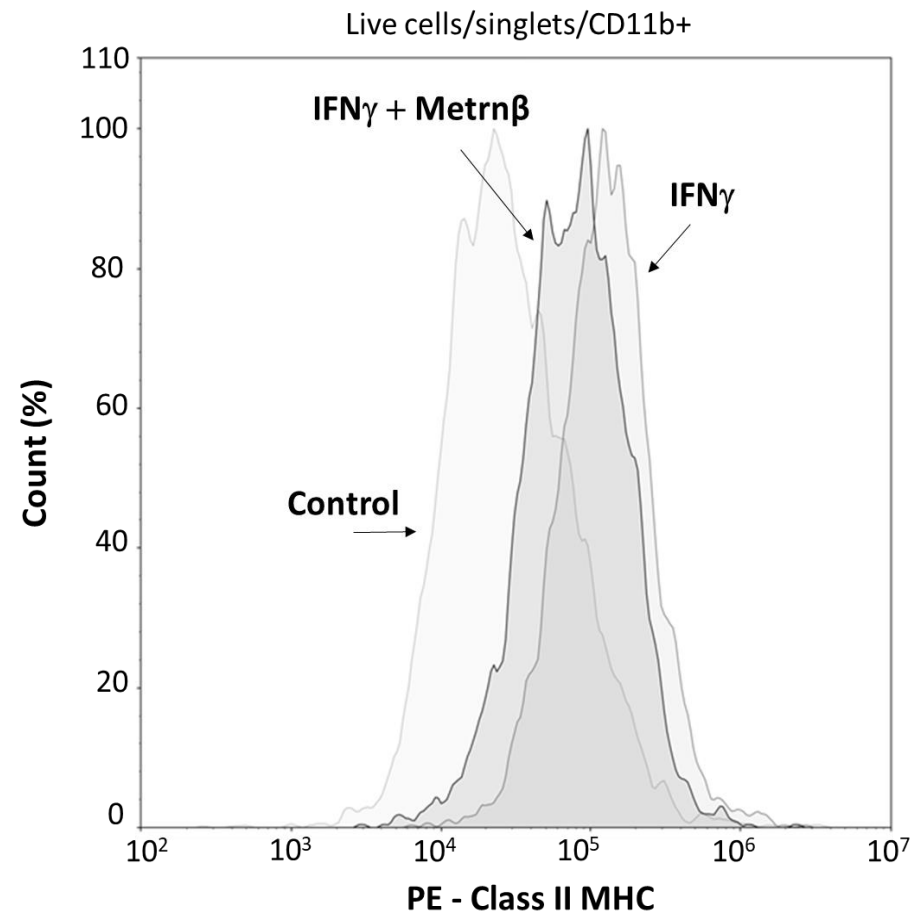

Supplementary Figure 2: Metrnb inhibits IFN $\gamma$ -induced expression of class II MHC in mouse peritoneal macrophages. Peritoneal macrophages from Metrnb $^{-/-}$  mice were incubated with 100 ng/ml of IFN $\gamma$  in the presence or absence of Metrnb (100 ng/ml) for 24 h and the cells were stained for FACS analysis with anti class II MHC mab.

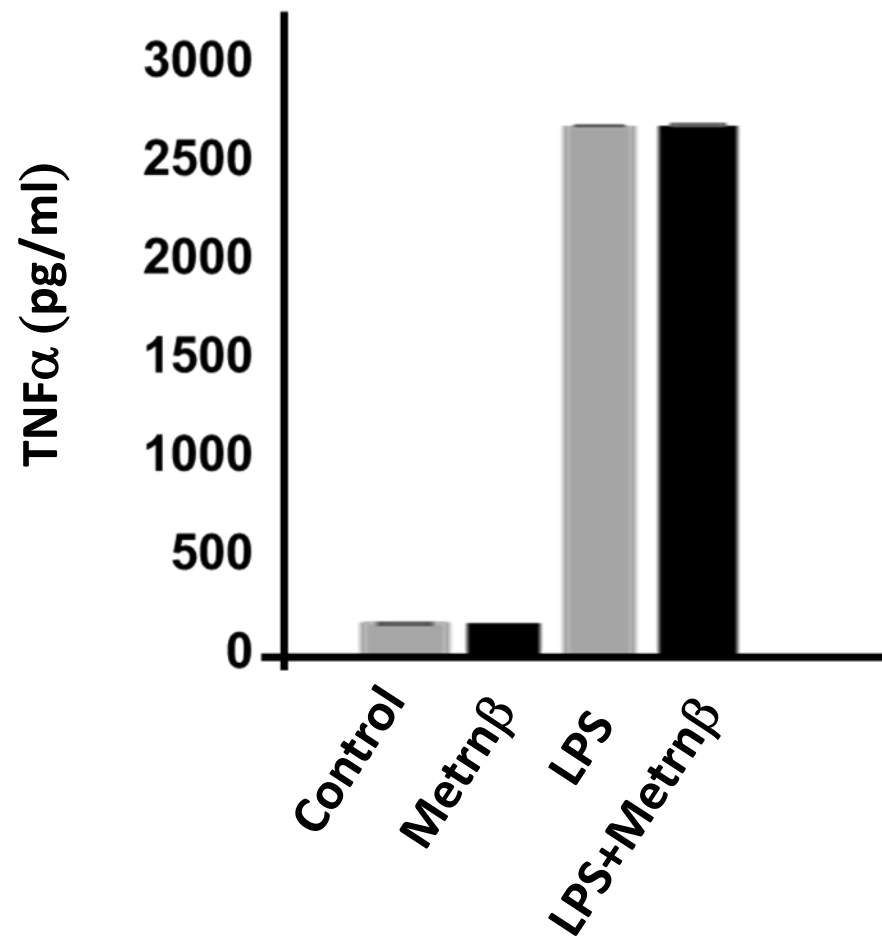

Supplementary Figure 3: Metr $\beta$  Does not affect the production of TNF $\alpha$  by RAW 264.7 macrophages. Cells were incubated with 250 ng/ml of Metr $\beta$  in the presence or absence of LPS (100 ng/ml) for 24 h and levels of TNF $\alpha$  were measured by ELISA.

## Expression of Metrnl/Metrn $\beta$ vs IL1RN in the BIGE database

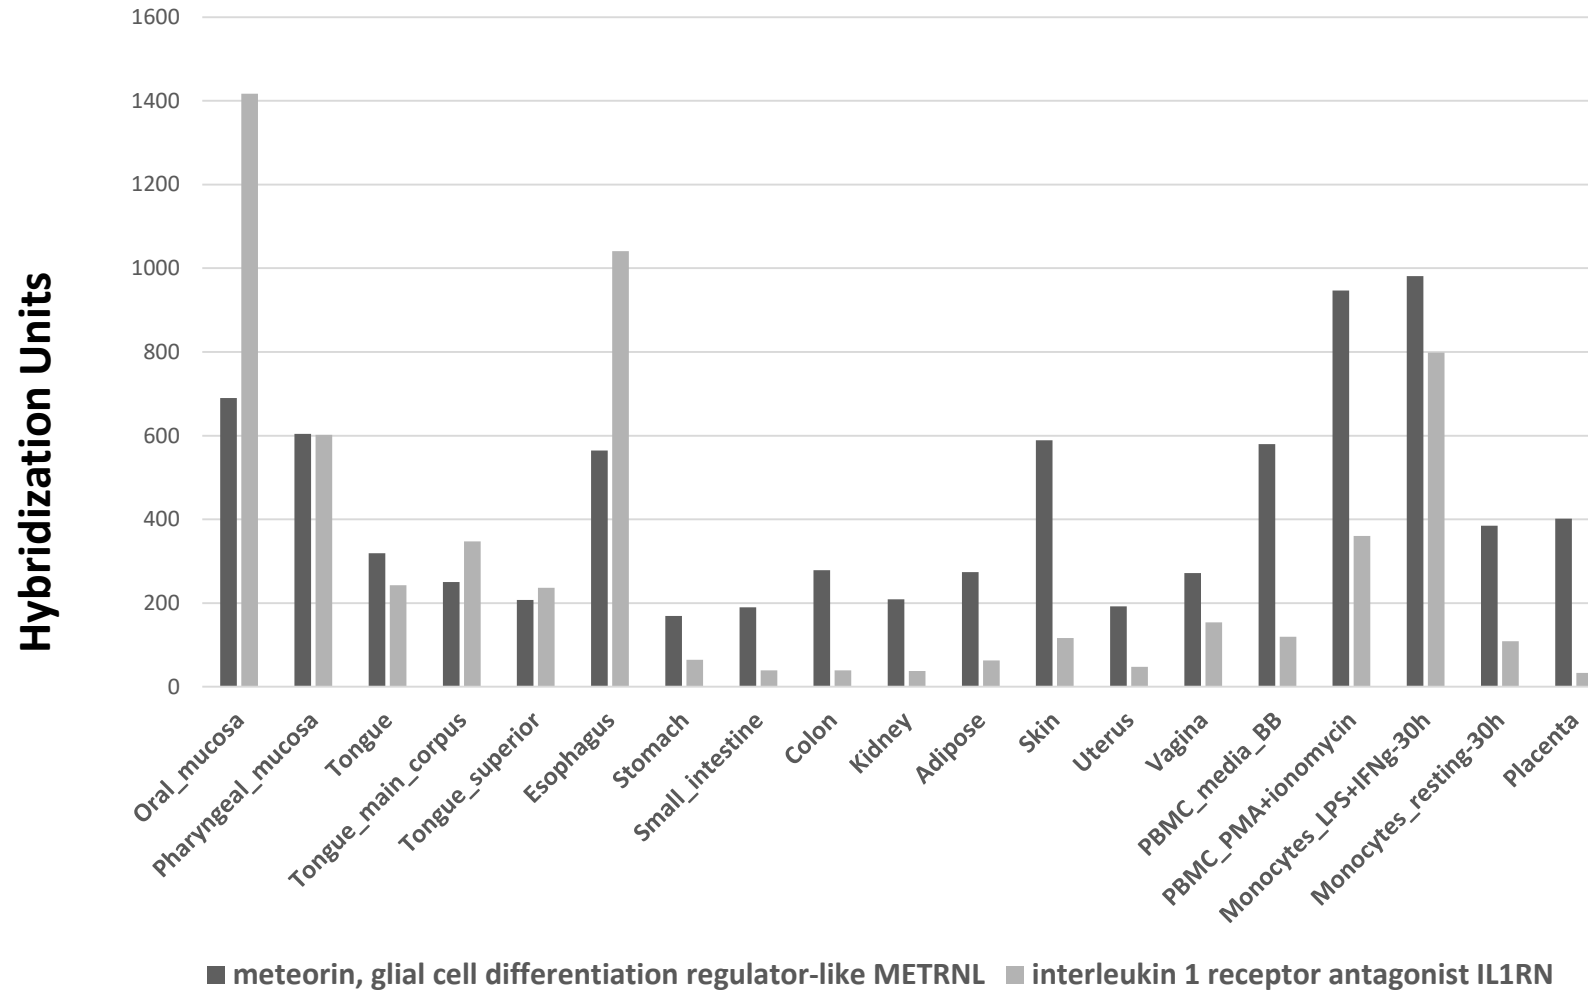

Supplementary Figure 4: Comparison of the expression of Metrnl/ Metr $\beta$  and IL-1 receptor antagonist (IL1RN) in the human body, from the Body Index of Gene Expression (BIGE) Database (1). The expression of Metr $\beta$  correlates with IL1RN. The highest expression of both Metr $\beta$  and IL1RN is observed in the oral cavity (oral and pharyngeal mucosa), tongue and esophagus, as well as in activated macrophages. Metr $\beta$  is expressed in some tissues where IL1RN is not expressed, including skin and placenta.
